# Supplementary material for: Systematic underestimation of type-specific ecosystem process variability in the Community Land Model v5 over Europe
Source: Copernicus journal article supplement (doi:10.5194/egusphere-2024-978), 2024-05-07
Supplement: Supplementary file 1 [file egusphere-2024-978-supplement.pdf]

1205 **Table S1: A list of ICOS stations, their land cover, their coordinates, the coordinates of the corresponding grid cell of the 3 km European CORDEX grid used in our simulations, and their number of 8-daily data points available for our analyses for ET and GPP. Note that stations that do not belong to PFT ENF, DBF, GRA, and CRO were omitted, and some included sites did not have data corresponding with the study period (1995 - 2018), thus having a count of 0 data points. See Section 2.2.1. Stations, where the land cover was not directly indicated in the metadata sites were also left out in our analyses.**

| ID            | country        | PFT | lat   | lon   | lat (cell) | lon (cell) | N (ET) | N (GPP) |
|---------------|----------------|-----|-------|-------|------------|------------|--------|---------|
| <b>BE-Bra</b> | Belgium        | ENF | 51.31 | 4.52  | 51.29      | 4.51       | 503    | 670     |
| <b>BE-Dor</b> | Belgium        | GRA | 50.31 | 4.97  | 50.31      | 4.96       | 0      | 270     |
| <b>BE-Lcr</b> | Belgium        | DBF | 51.11 | 3.85  | 51.10      | 3.85       | 0      | 0       |
| <b>BE-Lon</b> | Belgium        | CRO | 50.55 | 4.75  | 50.57      | 4.76       | 440    | 476     |
| <b>CH-Cha</b> | Switzerland    | GRA | 47.21 | 8.41  | 47.21      | 8.43       | 386    | 459     |
| <b>CH-Dav</b> | Switzerland    | ENF | 46.82 | 9.86  | 46.80      | 9.84       | 546    | 866     |
| <b>CH-Fru</b> | Switzerland    | GRA | 47.12 | 8.54  | 47.11      | 8.53       | 260    | 447     |
| <b>CH-Oe2</b> | Switzerland    | CRO | 47.29 | 7.73  | 47.28      | 7.72       | 0      | 592     |
| <b>CZ-BK1</b> | Czech Republic | ENF | 49.50 | 18.54 | 49.50      | 18.54      | 140    | 389     |
| <b>CZ-Lnz</b> | Czech Republic | DBF | 48.68 | 16.95 | 48.67      | 16.95      | 0      | 145     |
| <b>DE-Geb</b> | Germany        | CRO | 51.10 | 10.91 | 51.10      | 10.93      | 797    | 638     |
| <b>DE-Gri</b> | Germany        | GRA | 50.95 | 13.51 | 50.95      | 13.49      | 598    | 492     |
| <b>DE-Hai</b> | Germany        | DBF | 51.08 | 10.45 | 51.07      | 10.45      | 754    | 548     |
| <b>DE-HoH</b> | Germany        | DBF | 52.09 | 11.22 | 52.09      | 11.23      | 178    | 113     |
| <b>DE-Kli</b> | Germany        | CRO | 50.89 | 13.52 | 50.90      | 13.54      | 404    | 450     |
| <b>DE-RuR</b> | Germany        | GRA | 50.62 | 6.30  | 50.62      | 6.28       | 321    | 309     |
| <b>DE-RuS</b> | Germany        | CRO | 50.87 | 6.45  | 50.86      | 6.44       | 232    | 224     |
| <b>DE-RuW</b> | Germany        | ENF | 50.50 | 6.33  | 50.51      | 6.31       | 0      | 125     |
| <b>DE-Tha</b> | Germany        | ENF | 50.96 | 13.57 | 50.96      | 13.58      | 935    | 888     |
| <b>DK-Gds</b> | Denmark        | ENF | 56.07 | 9.33  | 56.07      | 9.34       | 0      | 0       |
| <b>DK-Sor</b> | Denmark        | DBF | 55.49 | 11.64 | 55.48      | 11.65      | 379    | 882     |

|               |         |     |       |       |       |       |     |     |
|---------------|---------|-----|-------|-------|-------|-------|-----|-----|
| <b>FI-Hyy</b> | Finland | ENF | 61.85 | 24.29 | 61.86 | 24.29 | 373 | 812 |
| <b>FI-Ken</b> | Finland | ENF | 67.99 | 24.24 | 67.99 | 24.23 | 0   | 18  |
| <b>FI-Let</b> | Finland | ENF | 60.64 | 23.96 | 60.63 | 23.96 | 344 | 254 |
| <b>FI-Var</b> | Finland | ENF | 67.75 | 29.61 | 67.76 | 29.63 | 119 | 133 |
| <b>FR-Aur</b> | France  | CRO | 43.55 | 1.11  | 43.54 | 1.12  | 389 | 483 |
| <b>FR-Bil</b> | France  | ENF | 44.49 | -0.96 | 44.50 | -0.98 | 188 | 144 |
| <b>FR-FBn</b> | France  | ENF | 43.24 | 5.68  | 43.25 | 5.69  | 0   | 358 |
| <b>FR-Fon</b> | France  | DBF | 48.48 | 2.78  | 48.47 | 2.80  | 0   | 566 |
| <b>FR-Gri</b> | France  | CRO | 48.84 | 1.95  | 48.86 | 1.95  | 397 | 313 |
| <b>FR-Hes</b> | France  | DBF | 48.67 | 7.06  | 48.67 | 7.05  | 224 | 219 |
| <b>FR-Lam</b> | France  | CRO | 43.50 | 1.24  | 43.51 | 1.25  | 439 | 431 |
| <b>FR-Tou</b> | France  | GRA | 43.57 | 1.37  | 43.58 | 1.38  | 45  | 28  |
| <b>IT-BFt</b> | Italy   | DBF | 45.20 | 10.74 | 45.21 | 10.75 | 0   | 0   |
| <b>IT-MBo</b> | Italy   | GRA | 46.01 | 11.05 | 46.00 | 11.04 | 554 | 582 |
| <b>IT-Ren</b> | Italy   | ENF | 46.59 | 11.43 | 46.58 | 11.44 | 466 | 525 |
| <b>IT-SR2</b> | Italy   | ENF | 43.73 | 10.29 | 43.74 | 10.31 | 238 | 214 |
| <b>IT-Tor</b> | Italy   | GRA | 45.84 | 7.58  | 45.85 | 7.57  | 333 | 251 |
| <b>RU-Fy2</b> | Russia  | ENF | 56.45 | 32.90 | 56.46 | 32.89 | 146 | 138 |
| <b>SE-Htm</b> | Sweden  | ENF | 56.10 | 13.42 | 56.10 | 13.42 | 171 | 152 |
| <b>SE-Nor</b> | Sweden  | ENF | 60.09 | 17.48 | 60.09 | 17.50 | 216 | 181 |
| <b>SE-Svb</b> | Sweden  | ENF | 64.26 | 19.77 | 64.26 | 19.77 | 138 | 109 |

1210 **Table S2: The RMSE and PBIAS for model ET in relation to the ICOS observations. Stations from ICOS that did not belong to PFT ENF, DBF, CRO, or GRA or did not have overlapping periods were omitted. See Section 2.4.2. For the amount of data points per station used for the calculations, see Table S1.**

|               | ET RMSE [mm day <sup>-1</sup> ] |                         |           |           |           | ET PBIAS [%]             |                         |           |           |           |
|---------------|---------------------------------|-------------------------|-----------|-----------|-----------|--------------------------|-------------------------|-----------|-----------|-----------|
|               | CLM5 <sub>grid</sub>            | CLM5 <sub>p</sub><br>FT | ERA<br>5L | GLA<br>SS | GLEA<br>M | CLM5 <sub>g</sub><br>rid | CLM5 <sub>p</sub><br>FT | ERA5<br>L | GLAS<br>S | GLEA<br>M |
| <b>BE-Bra</b> | 0.53                            | 0.52                    | 1.1       | 1.12      | 0.65      | 21.18                    | 23.28                   | 102.74    | 86.9      | 53.51     |
| <b>BE-Lon</b> | 0.65                            | 0.99                    | 0.92      | 0.83      | 0.48      | 13.44                    | 24.31                   | 67.7      | 44.85     | 20.31     |
| <b>CH-Cha</b> | 0.78                            | 0.85                    | 0.53      | 0.59      | 0.55      | -32.31                   | -21.19                  | -13.4     | -9.81     | -8.37     |
| <b>CH-Dav</b> | 1.19                            | 0.94                    | 1.35      | 0.91      | 0.84      | -50.35                   | -32.89                  | -54.06    | -31.86    | -27.21    |
| <b>CH-Fru</b> | 0.6                             | 0.85                    | 0.61      | 0.49      | 0.59      | -23.14                   | -8.38                   | -6.73     | -4.59     | 6.33      |
| <b>CZ-BK1</b> | 0.47                            | 0.54                    | 0.57      | 0.76      | 0.52      | -23.38                   | -25.8                   | 28.72     | 20.22     | 24.72     |
| <b>DE-Geb</b> | 0.51                            | 0.83                    | 0.86      | 0.71      | 0.48      | -6.91                    | -5.24                   | 64.07     | 40.18     | 14.67     |
| <b>DE-Gri</b> | 0.48                            | 0.77                    | 0.53      | 0.56      | 0.36      | 1.4                      | 10.84                   | 32.03     | 19.42     | 8.18      |
| <b>DE-Hai</b> | 0.48                            | 0.6                     | 0.75      | 0.72      | 0.5       | 1.23                     | 7.5                     | 54.25     | 42.96     | 27.83     |
| <b>DE-HoH</b> | 0.69                            | 0.65                    | 0.58      | 0.6       | 0.65      | -27.75                   | -16.19                  | -1.24     | -10.98    | -24.17    |
| <b>DE-Kli</b> | 0.64                            | 0.99                    | 0.7       | 0.74      | 0.58      | 3.53                     | 16.23                   | 36.42     | 24.16     | 20.33     |
| <b>DE-RuR</b> | 0.4                             | 0.77                    | 0.53      | 0.6       | 0.45      | -18.28                   | 5.14                    | 27.41     | 9.26      | 16.76     |
| <b>DE-RuS</b> | 0.79                            | 0.98                    | 0.49      | 0.64      | 0.69      | -35.1                    | -32.57                  | 4.96      | -15.5     | -27.25    |
| <b>DE-Tha</b> | 0.61                            | 0.49                    | 0.69      | 0.71      | 0.47      | 0.03                     | -0.58                   | 39.24     | 20.32     | 13.76     |
| <b>DK-Sor</b> | 0.6                             | 0.59                    | 0.65      | 0.55      | 0.5       | -25.3                    | -14.11                  | 40.06     | 19.22     | 2.01      |
| <b>FI-Hyy</b> | 0.5                             | 0.52                    | 0.41      | 0.49      | 0.63      | -35.03                   | -26.83                  | 20.28     | 11.59     | 41.51     |
| <b>FI-Let</b> | 0.67                            | 0.62                    | 0.78      | 0.61      | 0.71      | -32.63                   | -21.82                  | 48.73     | 9.52      | 38.69     |
| <b>FI-Var</b> | 0.37                            | 0.48                    | 0.46      | 0.69      | 0.59      | -34.03                   | -14.31                  | 65.47     | 55.65     | 85.29     |
| <b>FR-Aur</b> | 0.81                            | 1.18                    | 1.03      | 1.08      | 0.75      | 6.82                     | 47.61                   | 54.17     | 39.04     | 18.56     |
| <b>FR-Bil</b> | 0.67                            | 0.9                     | 0.7       | 1.5       | 0.68      | -25.39                   | -27.73                  | 23.93     | 50.29     | 24.77     |
| <b>FR-Gri</b> | 0.76                            | 1                       | 0.77      | 0.85      | 0.55      | -7.41                    | -2.62                   | 38.22     | 22.79     | -1.57     |
| <b>FR-Hes</b> | 0.58                            | 0.67                    | 0.86      | 0.83      | 0.72      | 0.92                     | 13.76                   | 52.3      | 36.7      | 36.96     |

|               |      |      |      |      |      |        |        |        |        |        |
|---------------|------|------|------|------|------|--------|--------|--------|--------|--------|
| <b>FR-Lam</b> | 0.85 | 1.09 | 0.98 | 0.96 | 0.78 | -8.52  | 19.85  | 29.34  | 15.93  | -3.31  |
| <b>FR-Tou</b> | 0.7  | 0.9  | 1.05 | 0.87 | 0.5  | -35.79 | -45.8  | 61.12  | 31.2   | 17.87  |
| <b>IT-MBo</b> | 0.53 | 0.8  | 0.46 | 0.48 | 0.7  | -2.52  | -17.37 | 8.64   | 6.11   | 15.84  |
| <b>IT-Ren</b> | 0.86 | 0.82 | 0.71 | 0.76 | 0.75 | -25.41 | -5.21  | -11.11 | -17.11 | -0.6   |
| <b>IT-SR2</b> | 0.91 | 1.56 | 0.76 | 0.71 | 0.81 | -33.93 | -60.78 | 28.67  | 4.92   | -23.63 |
| <b>IT-Tor</b> | 1.03 | 1.14 | 0.87 | 0.65 | 0.84 | -43.24 | -46.1  | -35.9  | -11.77 | -29.23 |
| <b>RU-Fy2</b> | 0.41 | 0.51 | 0.69 | 0.65 | 0.67 | -3.69  | -16.07 | 52.22  | 25.24  | 52.85  |
| <b>SE-Htm</b> | 0.45 | 0.45 | 0.89 | 1.18 | 0.9  | -7.53  | -3.65  | 72.62  | 60.16  | 77.51  |
| <b>SE-Nor</b> | 0.36 | 0.37 | 0.57 | 0.66 | 0.58 | -15.2  | -5.08  | 46.5   | 21.54  | 45.74  |
| <b>SE-Svb</b> | 0.46 | 0.6  | 0.33 | 0.52 | 0.56 | -22.3  | -4.25  | 14.62  | 14.77  | 33.97  |

1215

**Table S3: The RMSE and PBIAS for model GPP in relation to the ICOS observations. Stations from ICOS that did not belong to PFT ENF, DBF, CRO, or GRA or did not have overlapping periods were omitted. See Section 2.4.2. For the amount of data points per station used for the calculations, see Table S1.**

|               | GPP RMSE [g C day <sup>-1</sup> ] |                     |       | GPP PBIAS [%]        |                     |        |
|---------------|-----------------------------------|---------------------|-------|----------------------|---------------------|--------|
|               | CLM5 <sub>grid</sub>              | CLM5 <sub>PFT</sub> | GLASS | CLM5 <sub>grid</sub> | CLM5 <sub>PFT</sub> | GLASS  |
| <b>BE-Bra</b> | 2.29                              | 1.69                | 1.3   | -35.31               | 0.58                | 4.7    |
| <b>BE-Dor</b> | 3.19                              | 3.39                | 2.74  | -41.65               | -40.27              | -35.08 |
| <b>BE-Lon</b> | 4.31                              | 4.31                | 3.98  | -18.12               | -8.2                | -11.27 |
| <b>CH-Cha</b> | 4.61                              | 3.94                | 4.29  | -50.85               | -38.48              | -47.12 |
| <b>CH-Dav</b> | 2.4                               | 2.13                | 2.13  | -16.6                | 30.76               | -25.06 |
| <b>CH-Fru</b> | 3.6                               | 2.84                | 2.62  | -39.95               | -23.07              | -23.89 |
| <b>CH-Oe2</b> | 3.75                              | 3.95                | 3.53  | -10.63               | -12.43              | 2.68   |
| <b>CZ-BK1</b> | 2.79                              | 2.31                | 1.95  | -37.01               | -22.8               | -20.62 |
| <b>CZ-Lnz</b> | 4.64                              | 3.44                | 2.9   | -61.65               | -48.99              | -28.72 |
| <b>DE-Geb</b> | 3.63                              | 4.32                | 2.98  | -35.47               | -39.88              | -1.82  |
| <b>DE-Gri</b> | 2.61                              | 2.68                | 2.02  | -21.13               | -11.9               | -9.62  |
| <b>DE-Hai</b> | 2.83                              | 2.59                | 1.7   | -34.4                | -41.98              | -1.49  |
| <b>DE-HoH</b> | 2.94                              | 2.51                | 3.04  | -30.18               | -40.09              | -27.51 |
| <b>DE-Kli</b> | 3.5                               | 3.66                | 3.15  | 1.73                 | 2.03                | -2.71  |
| <b>DE-RuR</b> | 2.4                               | 2.39                | 2     | -26.97               | -10.45              | -19.49 |
| <b>DE-RuS</b> | 4.74                              | 5.05                | 4.34  | -43.33               | -45.5               | -34.54 |
| <b>DE-RuW</b> | 2.63                              | 2.61                | 2.14  | -32.06               | -27.58              | -23.83 |
| <b>DE-Tha</b> | 1.87                              | 1.48                | 1.29  | -28.94               | -3.95               | -19.24 |
| <b>DK-Sor</b> | 4.39                              | 4.07                | 3.21  | -47.92               | -49.59              | -35.2  |
| <b>FI-Hyy</b> | 1.3                               | 1.29                | 0.81  | -14.86               | -0.32               | -8.87  |
| <b>FI-Ken</b> | 1.16                              | 2.34                | 0.72  | -2.71                | 53.03               | -13.93 |
| <b>FI-Let</b> | 2.05                              | 2.02                | 1.53  | -19.04               | -4.69               | -19.86 |
| <b>FI-Var</b> | 1.4                               | 3.22                | 0.89  | 58.88                | 155.55              | 20.97  |

|               |      |      |      |        |        |        |
|---------------|------|------|------|--------|--------|--------|
| <b>FR-Aur</b> | 3.28 | 4.05 | 3.25 | 9.34   | 68.22  | 8.98   |
| <b>FR-Bil</b> | 1.75 | 2.23 | 1.67 | -24.81 | -24.43 | -0.67  |
| <b>FR-FBn</b> | 2.38 | 3.73 | 1.82 | -48.88 | -77.01 | 15.32  |
| <b>FR-Fon</b> | 3.1  | 2.87 | 2.74 | -26.88 | -36.12 | -21.86 |
| <b>FR-Gri</b> | 4.16 | 4.24 | 3.73 | -18.64 | -13.82 | -15.47 |
| <b>FR-Hes</b> | 3.7  | 3.24 | 3.32 | -24.24 | -35.9  | -17.18 |
| <b>FR-Lam</b> | 3.91 | 4.5  | 3.95 | -4.08  | 44.74  | -8.86  |
| <b>FR-Tou</b> | 3.44 | 2.53 | 1.77 | -73.37 | -47.07 | -10.42 |
| <b>IT-MBo</b> | 2.42 | 2.89 | 1.84 | -7.88  | -31.82 | 3.25   |
| <b>IT-Ren</b> | 1.53 | 2.32 | 1.77 | 11.56  | 33.15  | -2.03  |
| <b>IT-SR2</b> | 5.12 | 6.78 | 4.07 | -67.17 | -88.85 | -53.94 |
| <b>IT-Tor</b> | 1.82 | 2.49 | 1.66 | -0.73  | 1.01   | 1.16   |
| <b>RU-Fy2</b> | 2.63 | 2.84 | 1.93 | -26.01 | -22.21 | -23.36 |
| <b>SE-Htm</b> | 2.74 | 2.24 | 1.95 | -38.02 | -25.41 | -26.83 |
| <b>SE-Nor</b> | 1.59 | 1.37 | 1.35 | -25.47 | -3.78  | -21.52 |
| <b>SE-Svb</b> | 1.13 | 2.02 | 1.22 | 5.6    | 24.88  | -24.05 |

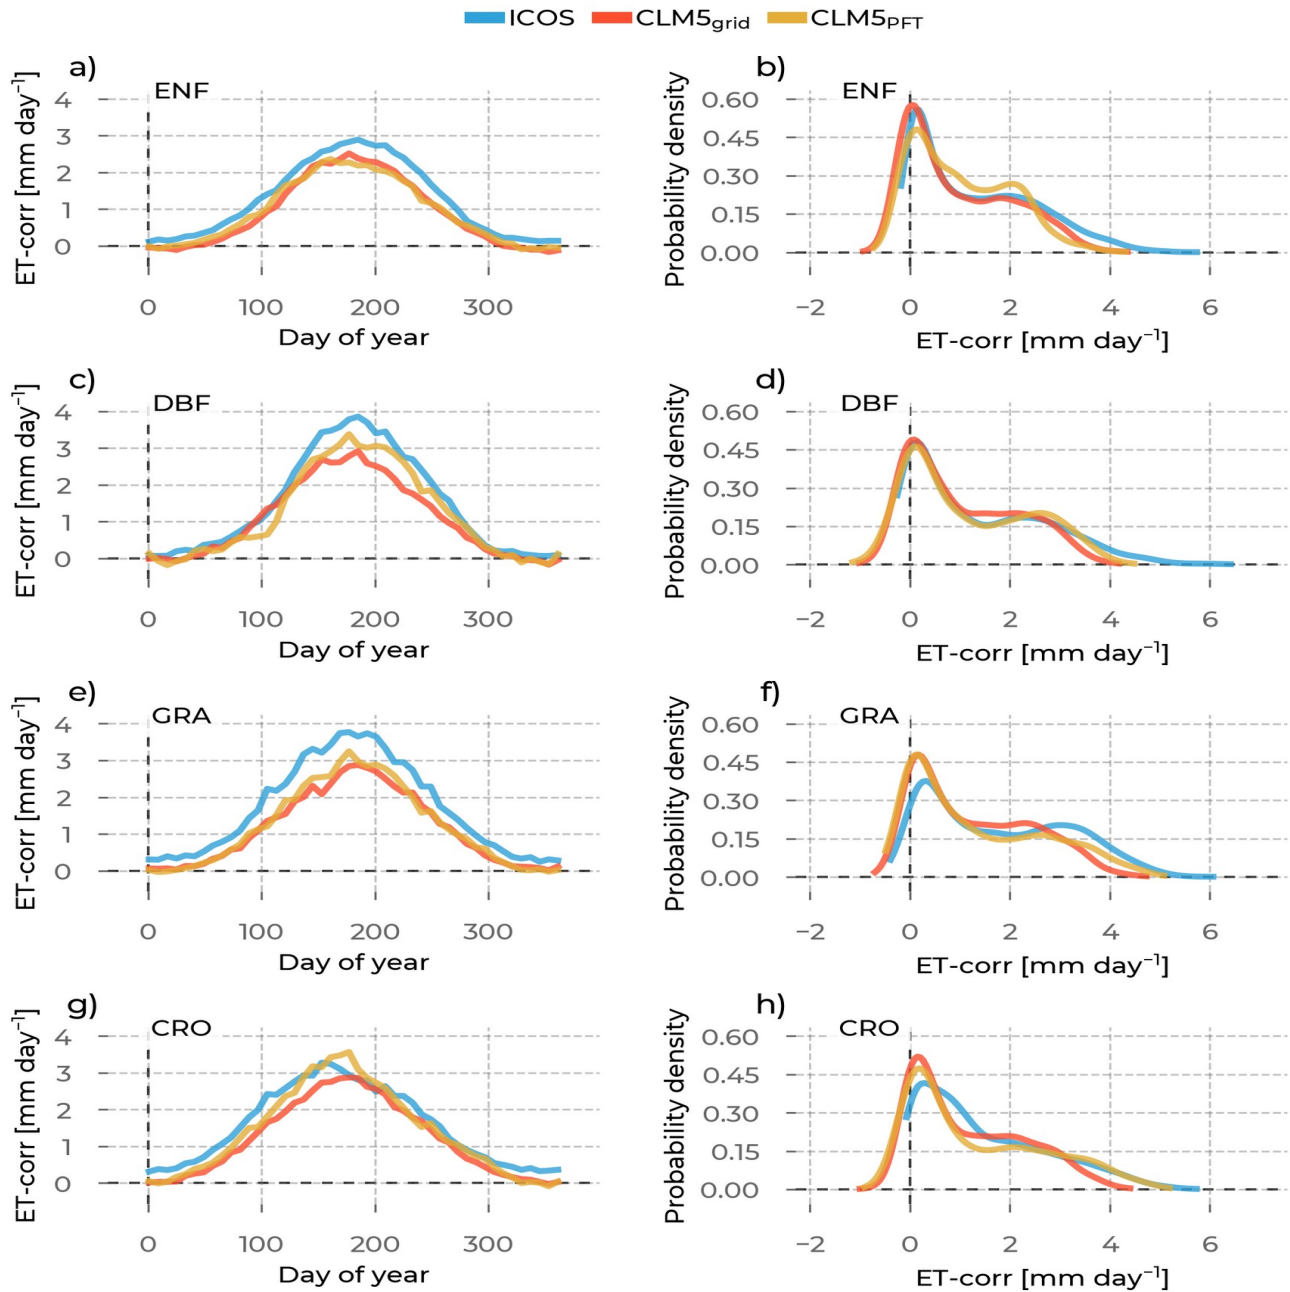

1220

**Figure S1:** In the left column are the yearly energy balance corrected evapotranspiration (ET-corr) evolutions averaged across stations belonging to one PFT (rows). We differentiate the data source by color (ICOS observations: blue, CLM5<sub>grid</sub>: red, CLM5<sub>PFT</sub>: yellow, GLASS: green, ERA5L: brown, GLEAM: purple). The probability density curves for all ET-corr values from

1225 **stations belonging to the selected PFT are in the right column. Each row shows these plots for one PFT: Evergreen Needleleaf Forest (ENF), Deciduous Broadleaf Forest (DBF), Grasslands (GRA), and Croplands (CRO).**



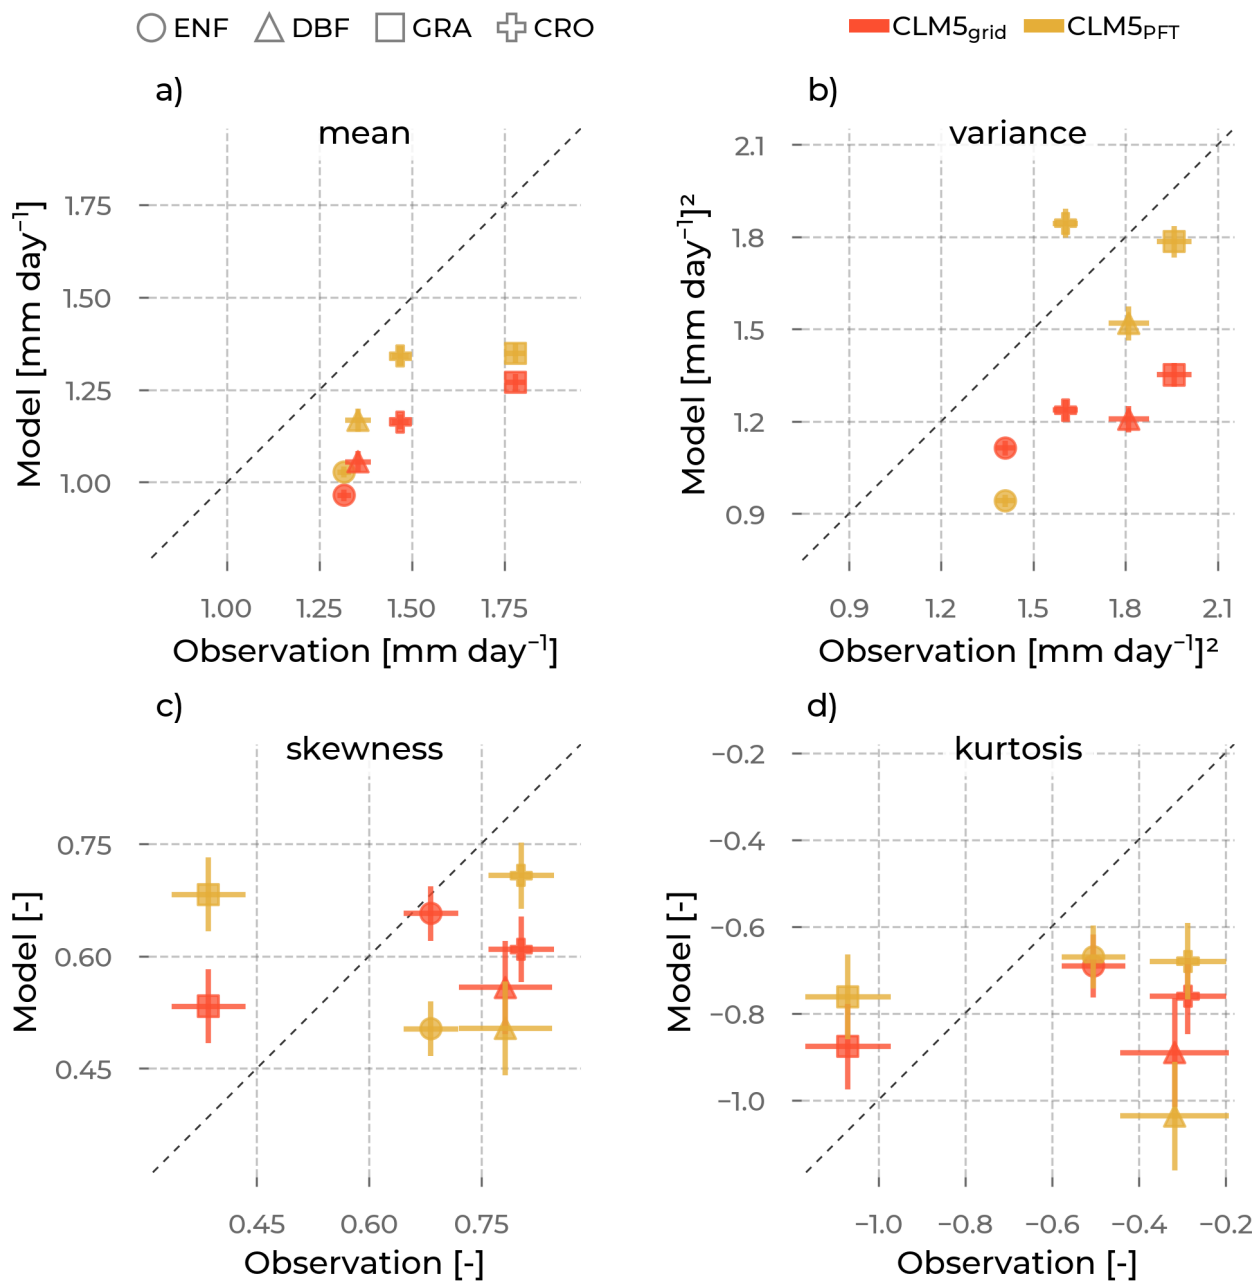

**Figure S2: The mean (a), variance (b), skewness (c), and kurtosis (d) of the ET-corr distributions from the models (color, y-axis), as opposed to the corresponding values from observations (x-axis) aggregated for each PFT (marker type): Evergreen Needleleaf Forest (ENF), Deciduous Broadleaf Forest (DBF), Grasslands (GRA), Croplands (CRO). The error bars are the standard errors of the respective moment, depending on the sample size.**

1230

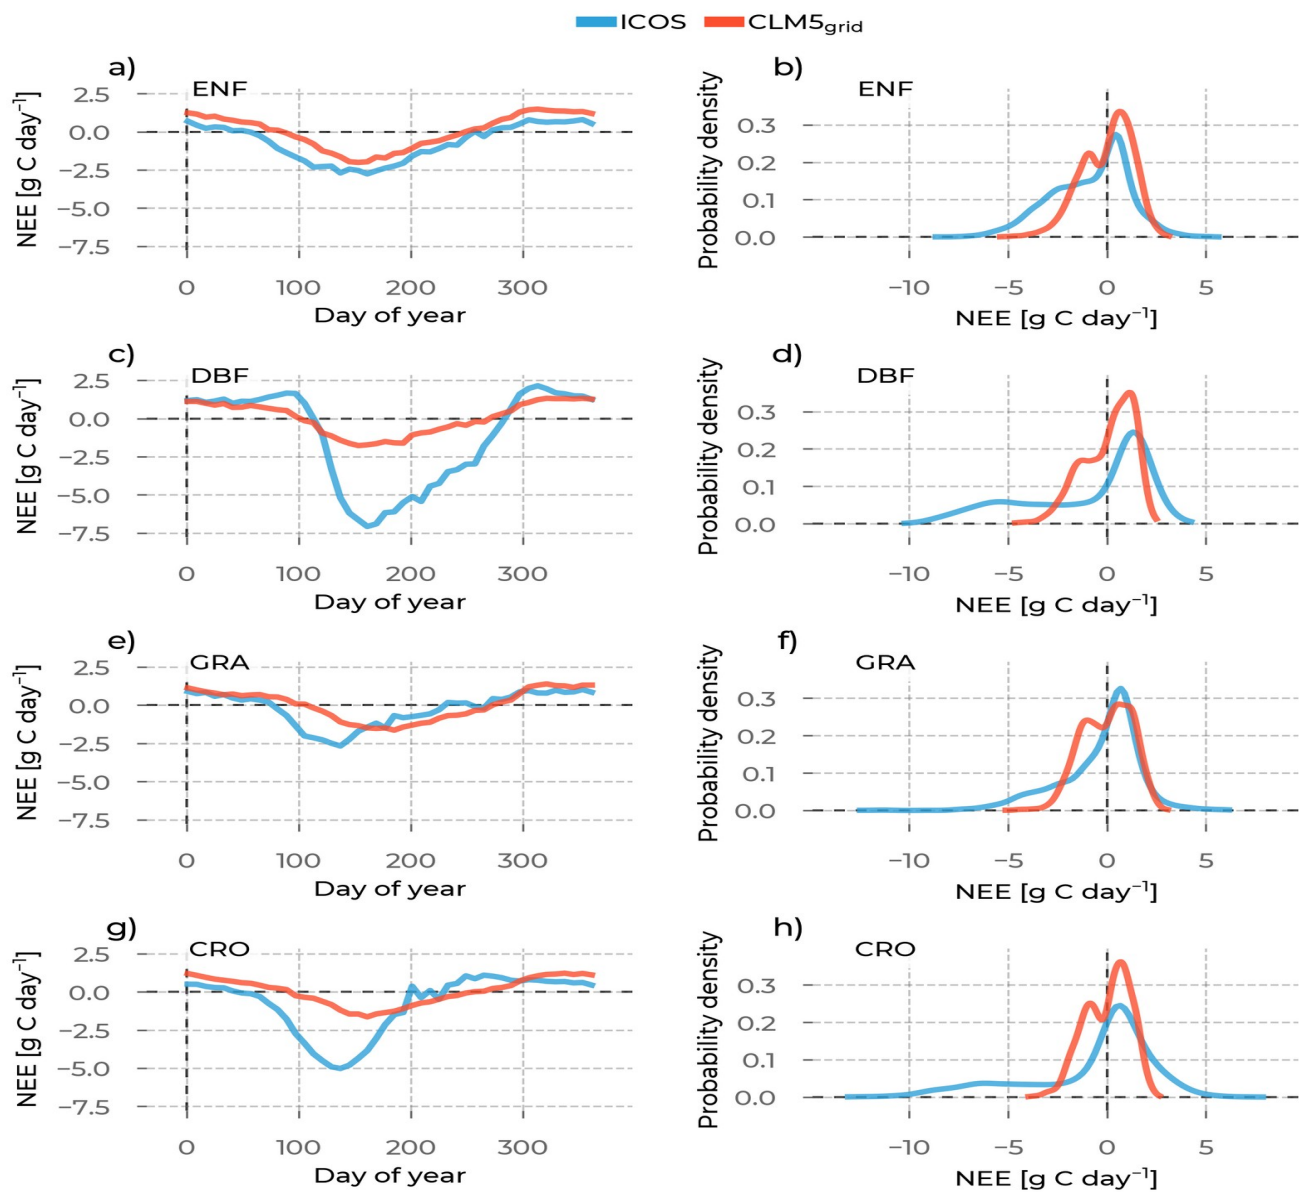

1235 **Figure S3: In the left column are the yearly net ecosystem exchange (NEE) evolutions averaged**  
**across stations belonging to one PFT (rows). We differentiate the data source by color (ICOS**  
**observations: blue, CLM5<sub>grid</sub>: red, CLM5<sub>PFT</sub>: yellow, GLASS: green, ERA5L: brown, GLEAM:**  
**purple). The probability density curves for all NEE values from stations belonging to the**  
**selected PFT are in the right column. Each row shows these plots for one PFT: Evergreen**  
1240 **Needleleaf Forest (ENF), Deciduous Broadleaf Forest (DBF), Grasslands (GRA), and Croplands**  
**(CRO).**

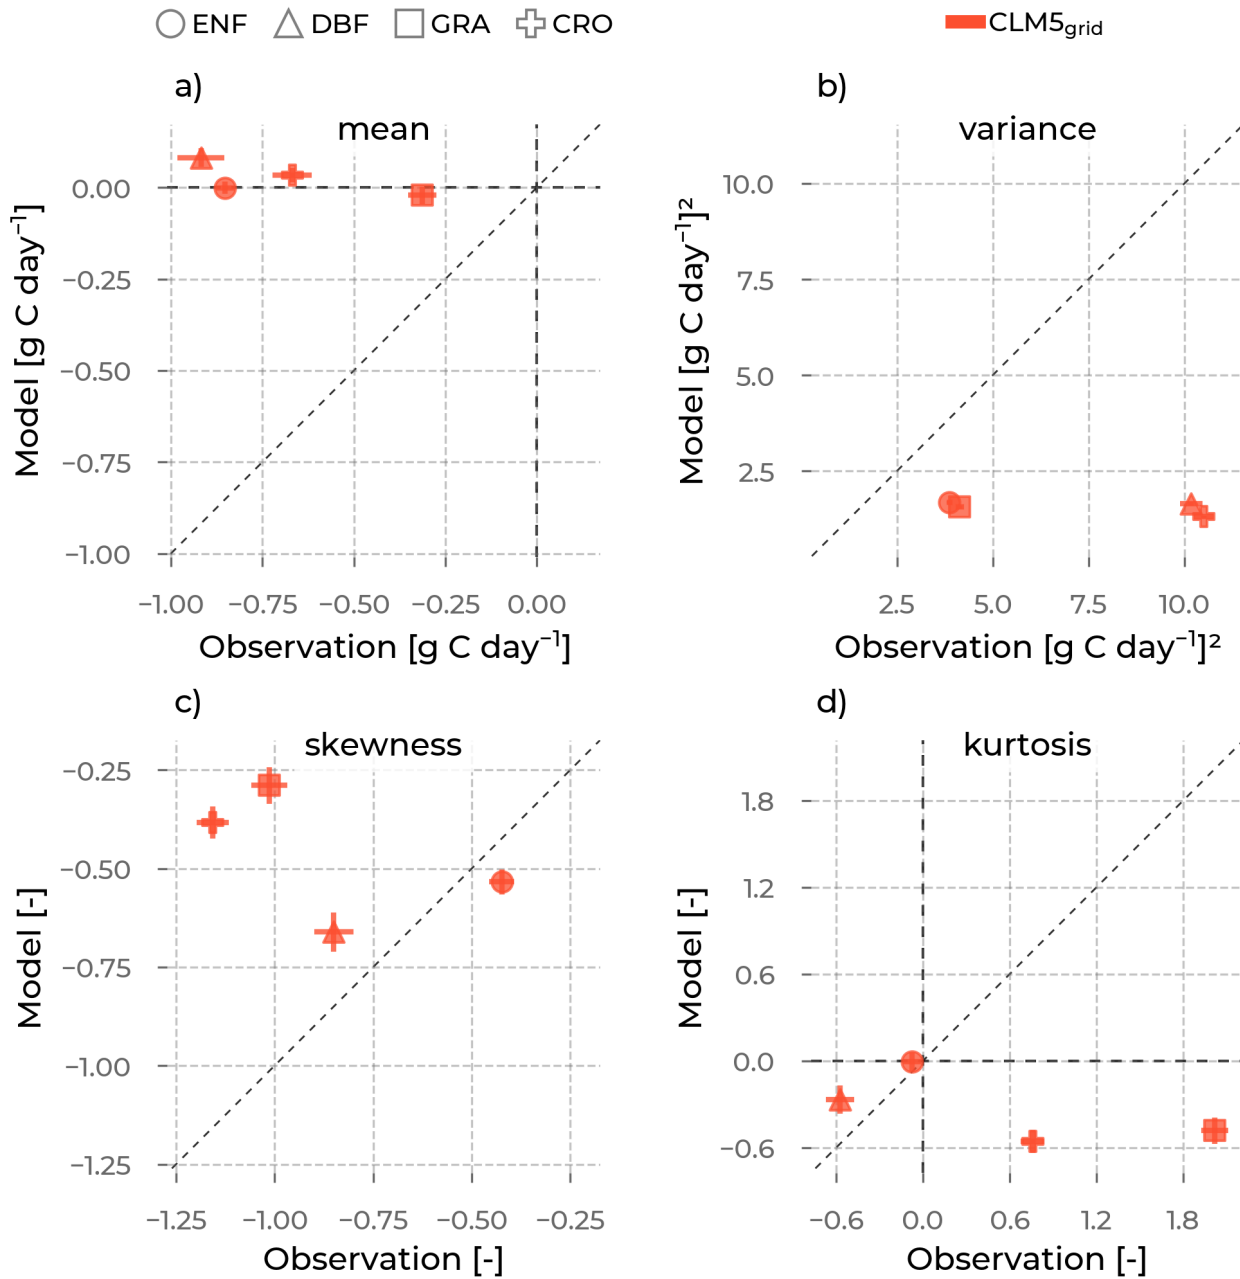

**Figure S4: The mean (a), variance (b), skewness (c), and kurtosis (d) of the NEE distributions from the models (color, y-axis), as opposed to the corresponding values from observations (x-axis) aggregated for each PFT (marker type): Evergreen Needleleaf Forest (ENF), Deciduous Broadleaf Forest (DBF), Grasslands (GRA), Croplands (CRO). The error bars are the standard errors of the respective moment, depending on the sample size.**

1245

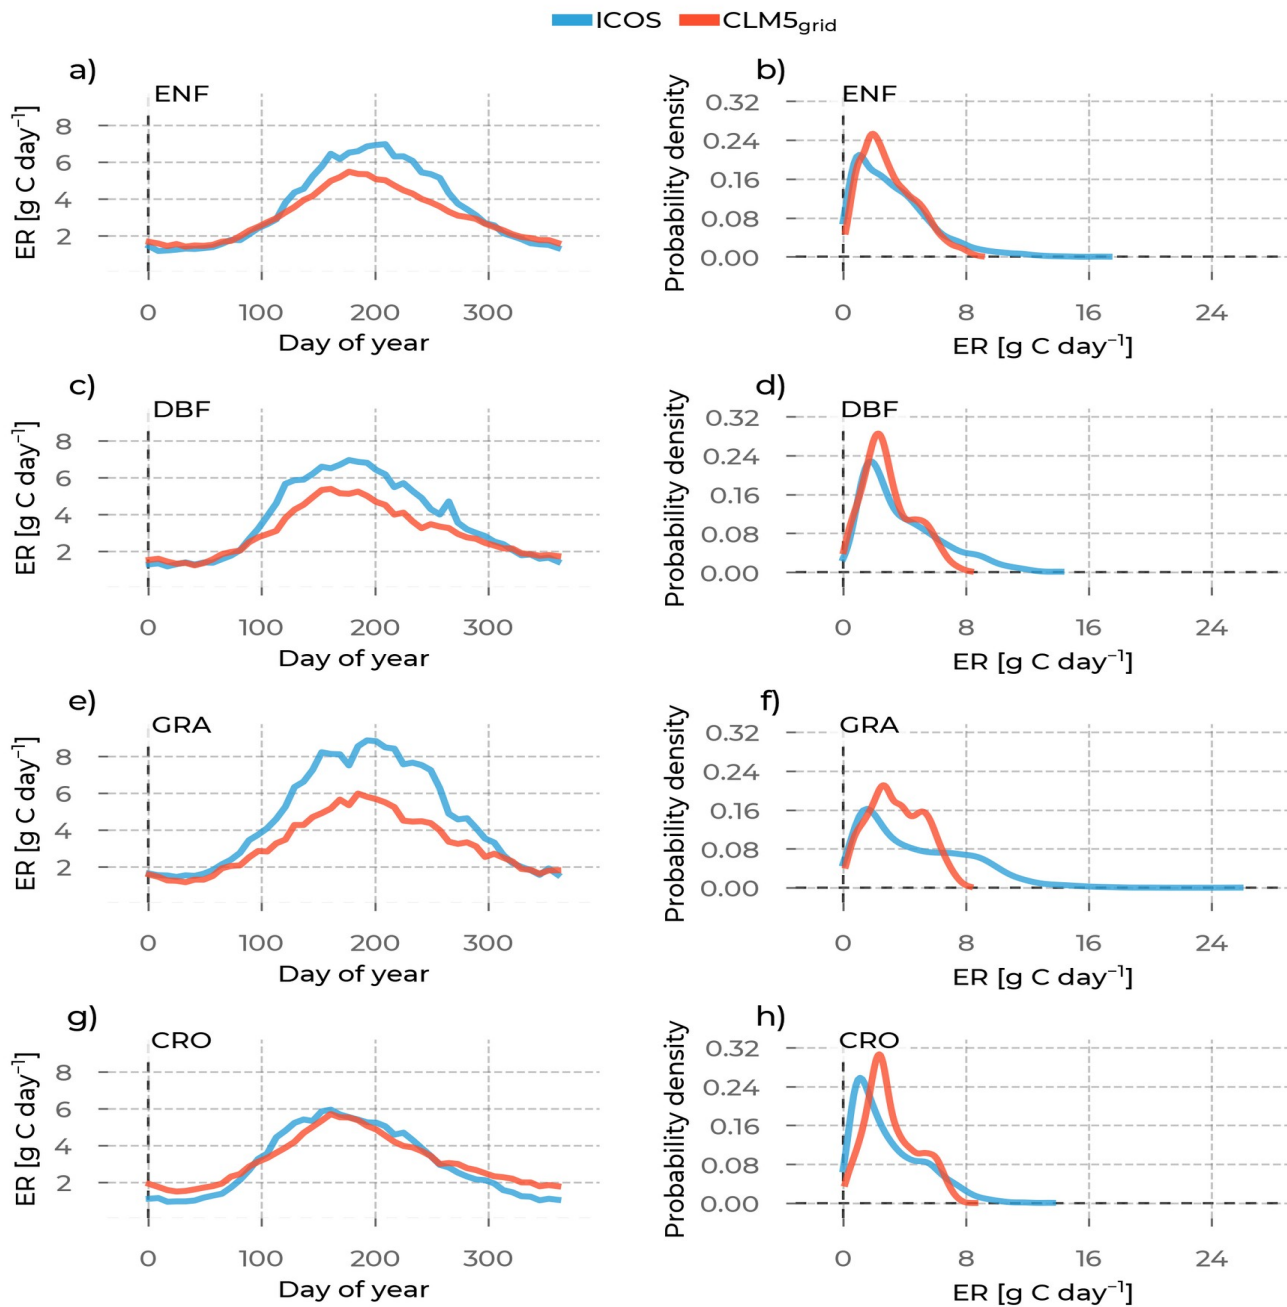

**Figure S5:** In the left column are the yearly ecosystem respiration (ER) evolutions averaged across stations belonging to one PFT (rows). We differentiate the data source by color (ICOS observations: blue, CLM5<sub>grid</sub>: red, CLM5<sub>PFT</sub>: yellow, GLASS: green, ERA5L: brown, GLEAM: purple). The probability density curves for all ER values from stations belonging to the selected

1250

PFT are in the right column. Each row shows these plots for one PFT: Evergreen Needleleaf Forest (ENF), Deciduous Broadleaf Forest (DBF), Grasslands (GRA), and Croplands (CRO).

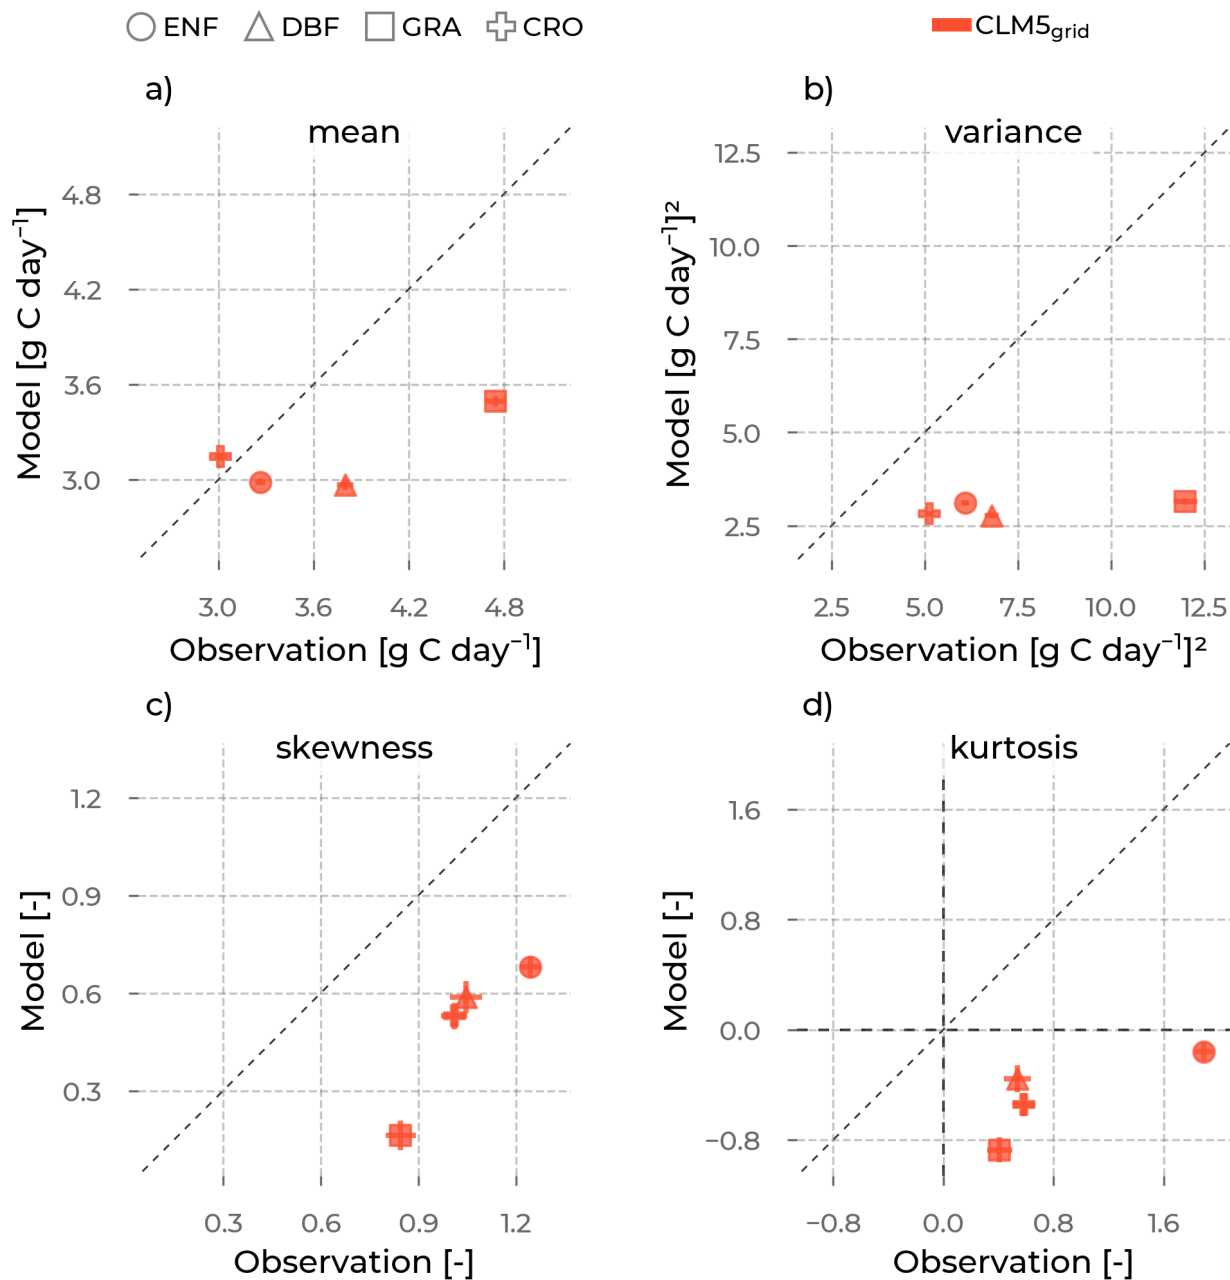

1255

Figure S6: The mean (a), variance (b), skewness (c), and kurtosis (d) of the ER distributions from the models (color, y-axis), as opposed to the corresponding values from observations (x-axis).

axis) aggregated for each PFT (marker type): Evergreen Needleleaf Forest (ENF), Deciduous Broadleaf Forest (DBF), Grasslands (GRA), Croplands (CRO). The error bars are the standard errors of the respective moment, depending on the sample size.

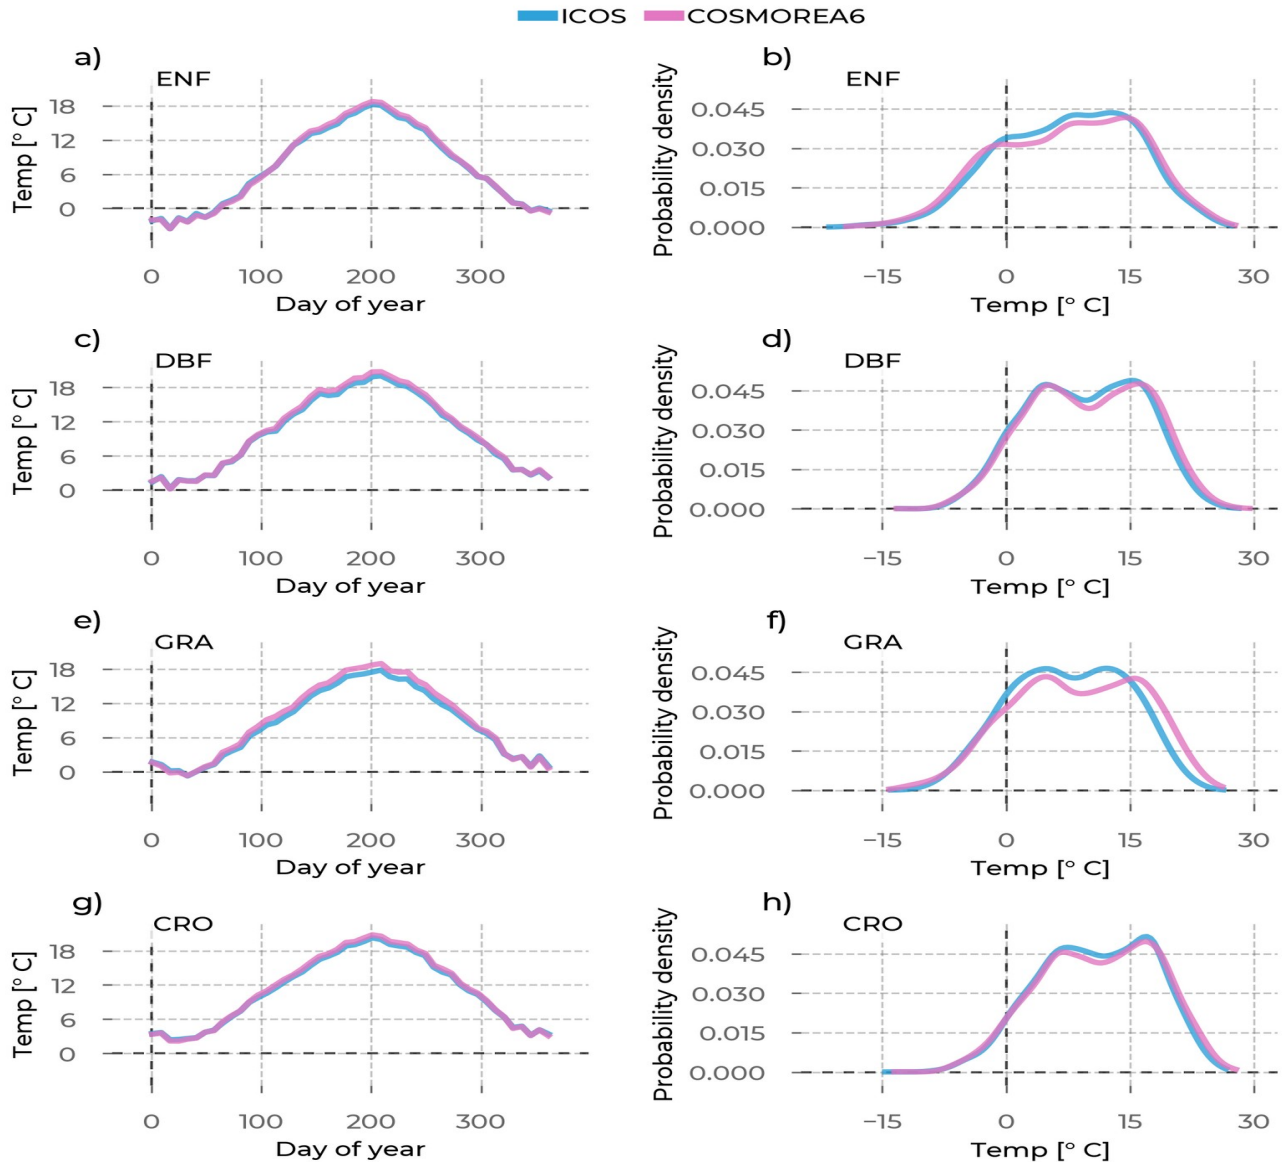

Figure S7: In the left column are the yearly Temperature (Temp) evolutions averaged across stations belonging to one PFT (rows). We differentiate the data source by color (ICOS observations: blue, CLM5<sub>grid</sub>: red, CLM5<sub>PFT</sub>: yellow, GLASS: green, ERA5L: brown, GLEAM: purple). The probability density curves for all Temp values from stations belonging to the selected PFT are in the right column. Each row shows these plots for one PFT: Evergreen

**Needleleaf Forest (ENF), Deciduous Broadleaf Forest (DBF), Grasslands (GRA), and Croplands (CRO).**

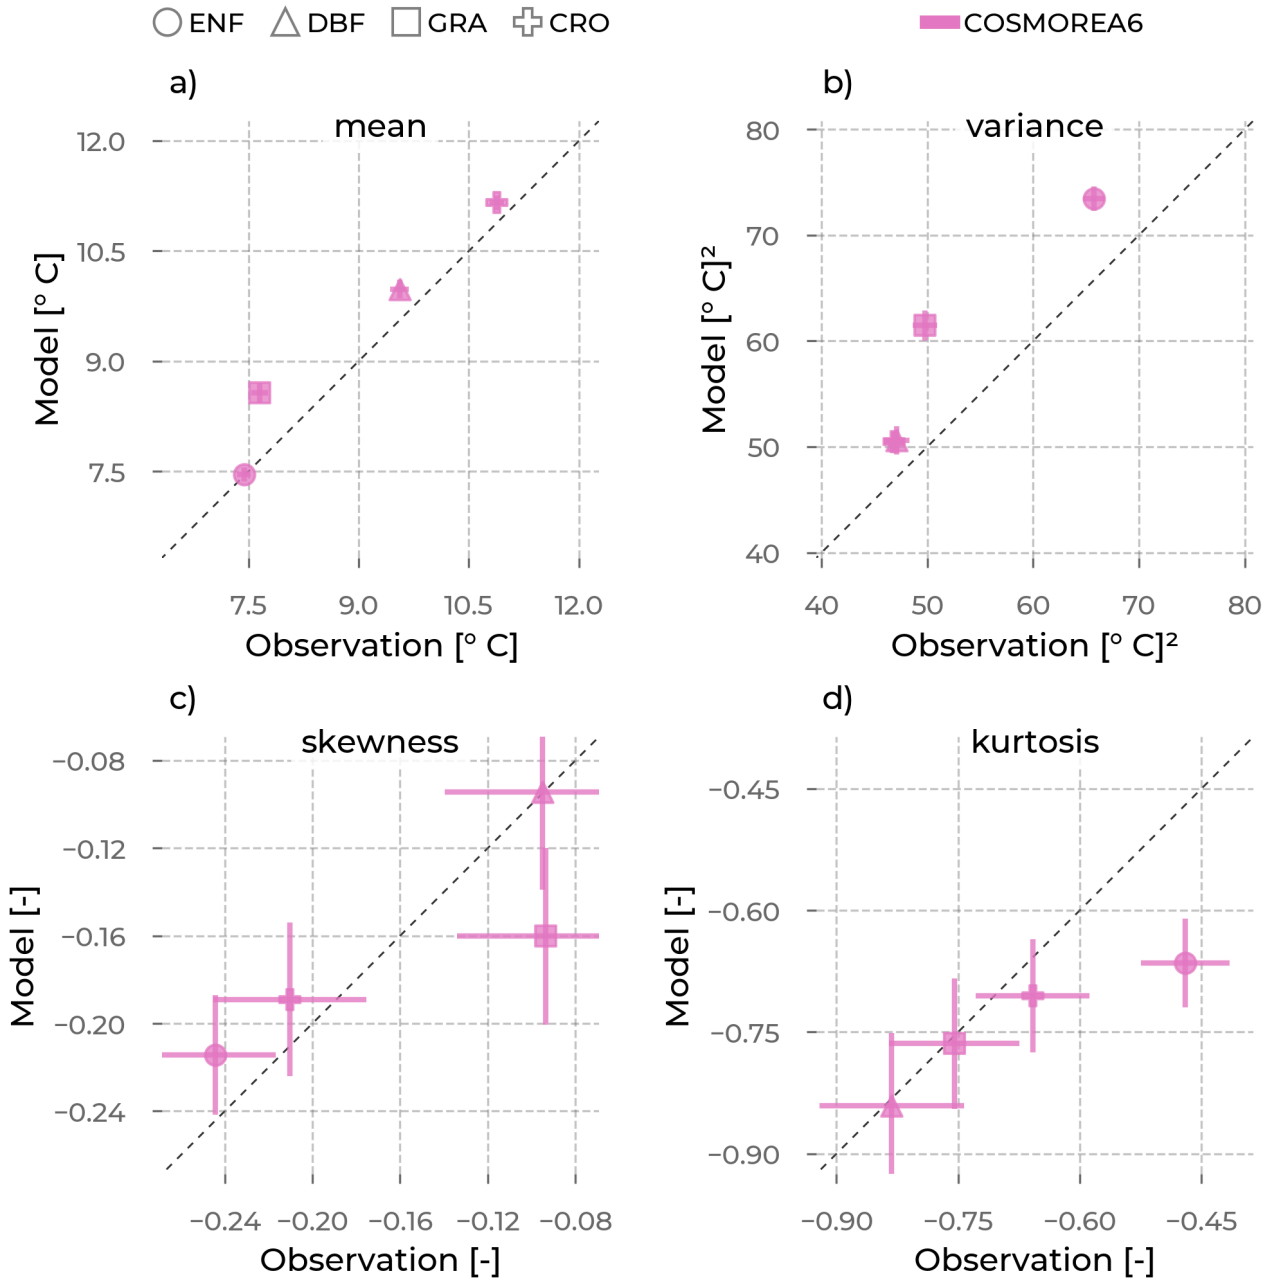

1270 **Figure S8: The mean (a), variance (b), skewness (c), and kurtosis (d) of the Temp distributions from the models (color, y-axis), as opposed to the corresponding values from observations (x-**



axis) aggregated for each PFT (marker type): Evergreen Needleleaf Forest (ENF), Deciduous Broadleaf Forest (DBF), Grasslands (GRA), Croplands (CRO). The error bars are the standard errors of the respective moment, depending on the sample size.

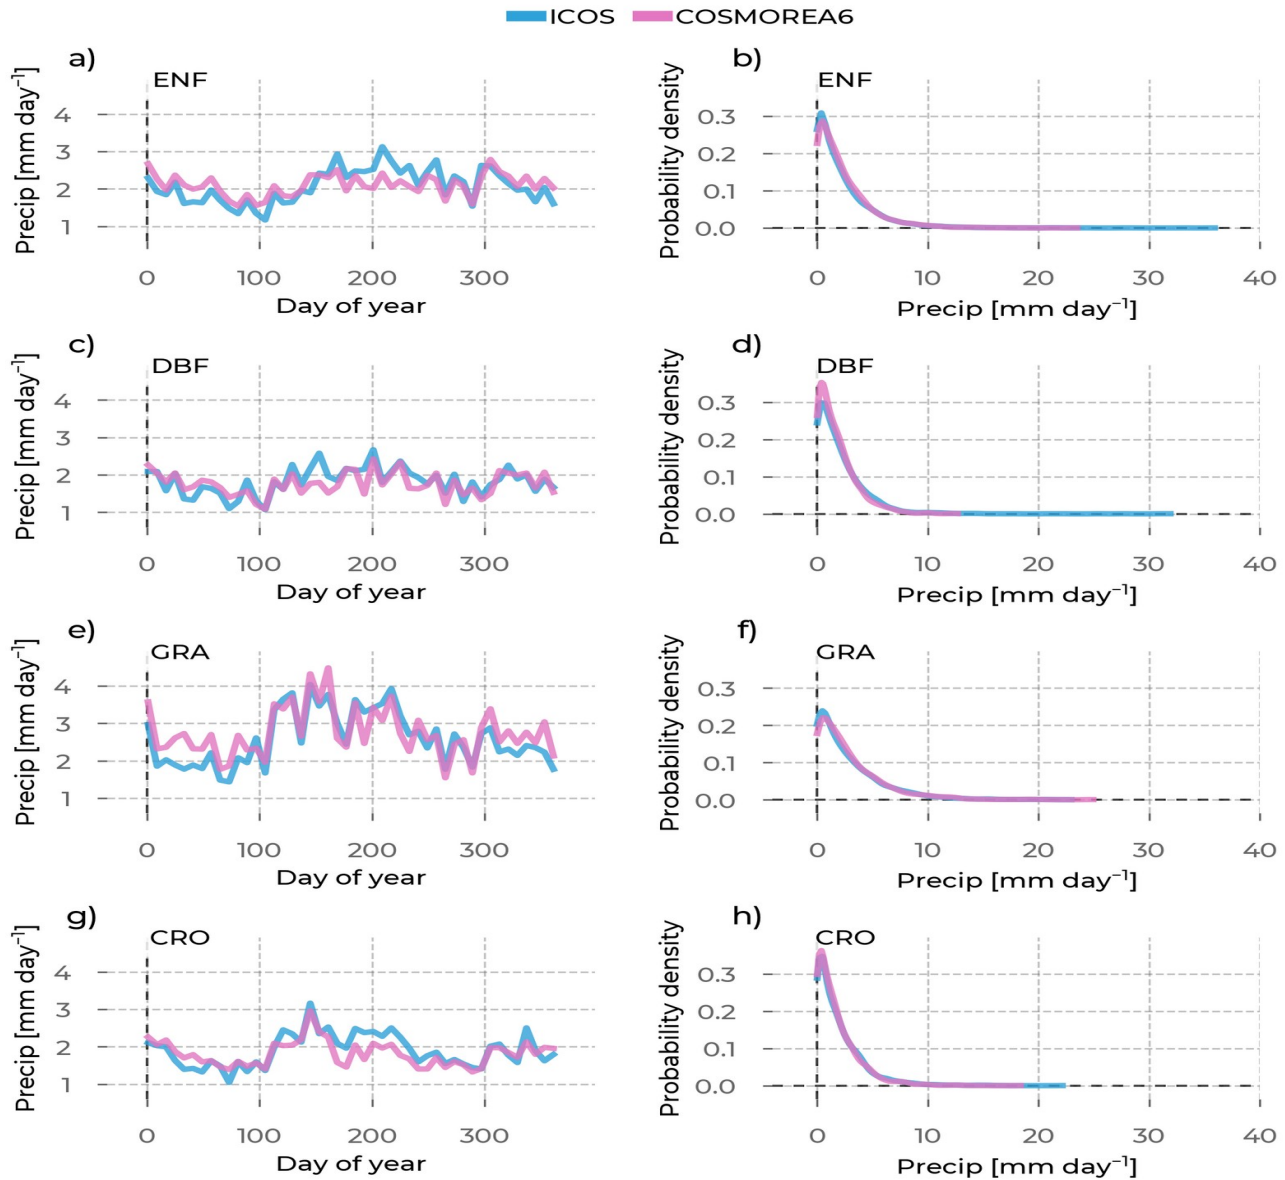

1275

**Figure S9:** In the left column are the yearly Precipitation (Precip) evolutions averaged across stations belonging to one PFT (rows). We differentiate the data source by color (ICOS observations: blue, CLM5<sub>grid</sub>: red, CLM5<sub>PFT</sub>: yellow, GLASS: green, ERA5L: brown, GLEAM: purple). The probability density curves for all Precip values from stations belonging to the



1280 **selected PFT are in the right column. Each row shows these plots for one PFT: Evergreen Needleleaf Forest (ENF), Deciduous Broadleaf Forest (DBF), Grasslands (GRA), and Croplands (CRO).**

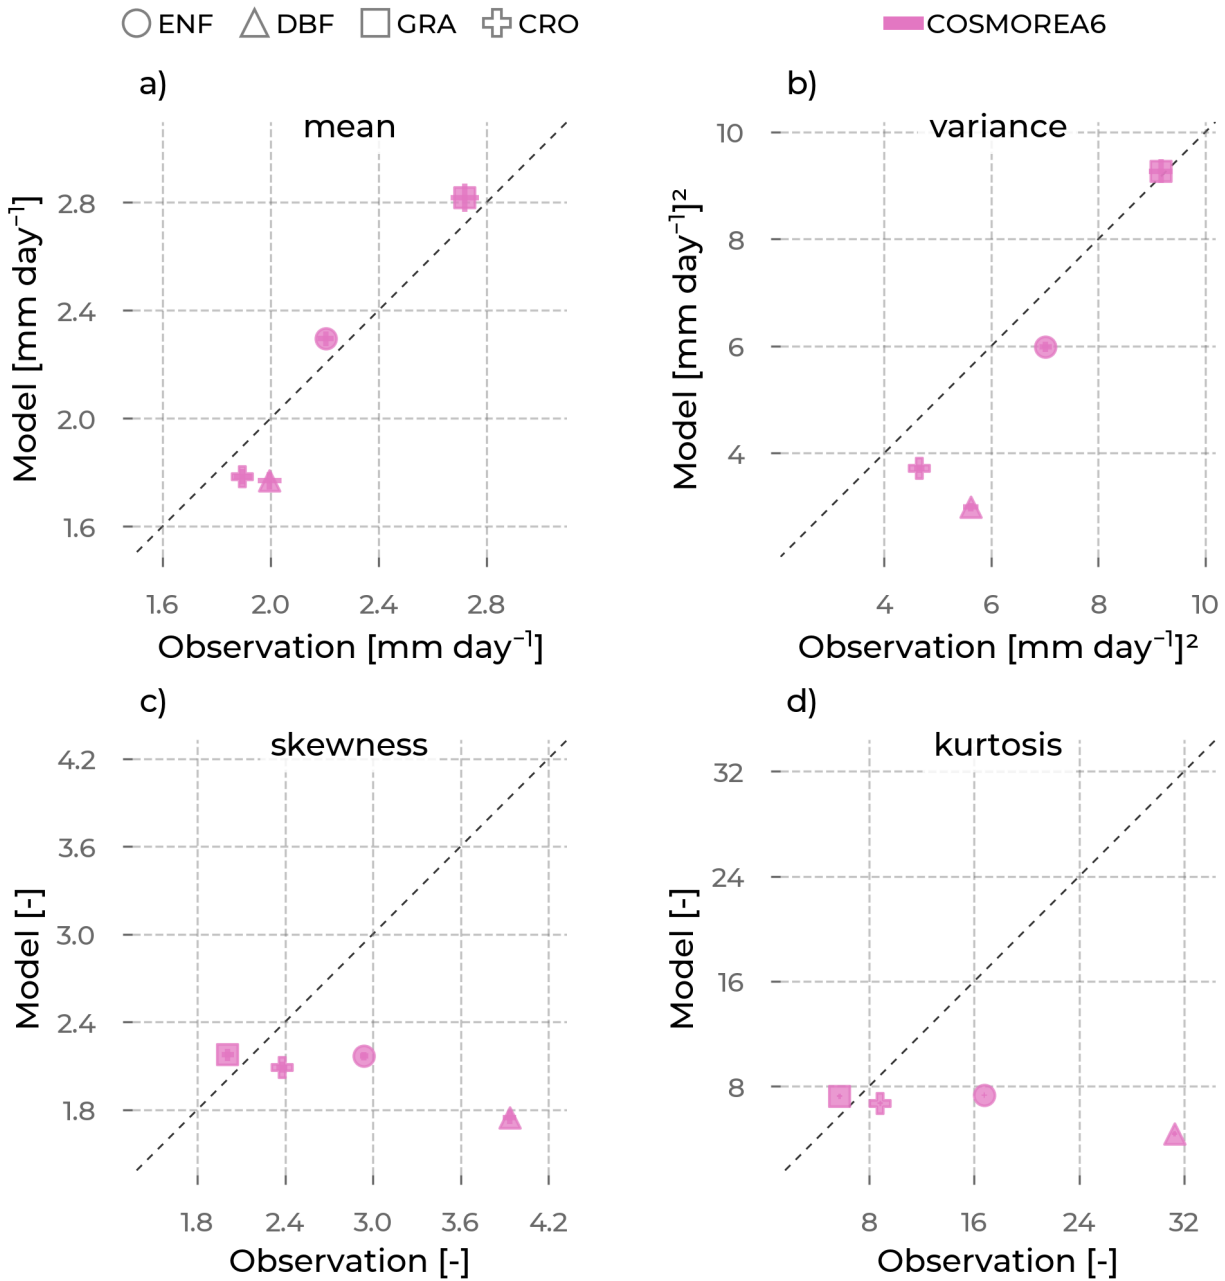

**Figure S10: The mean (a), variance (b), skewness (c), and kurtosis (d) of the Precip distributions from the models (color, y-axis), as opposed to the corresponding values from observations (x-axis) aggregated for each PFT (marker type): Evergreen Needleleaf Forest (ENF), Deciduous Broadleaf Forest (DBF), Grasslands (GRA), Croplands (CRO). The error bars are the standard errors of the respective moment, depending on the sample size.**

1285

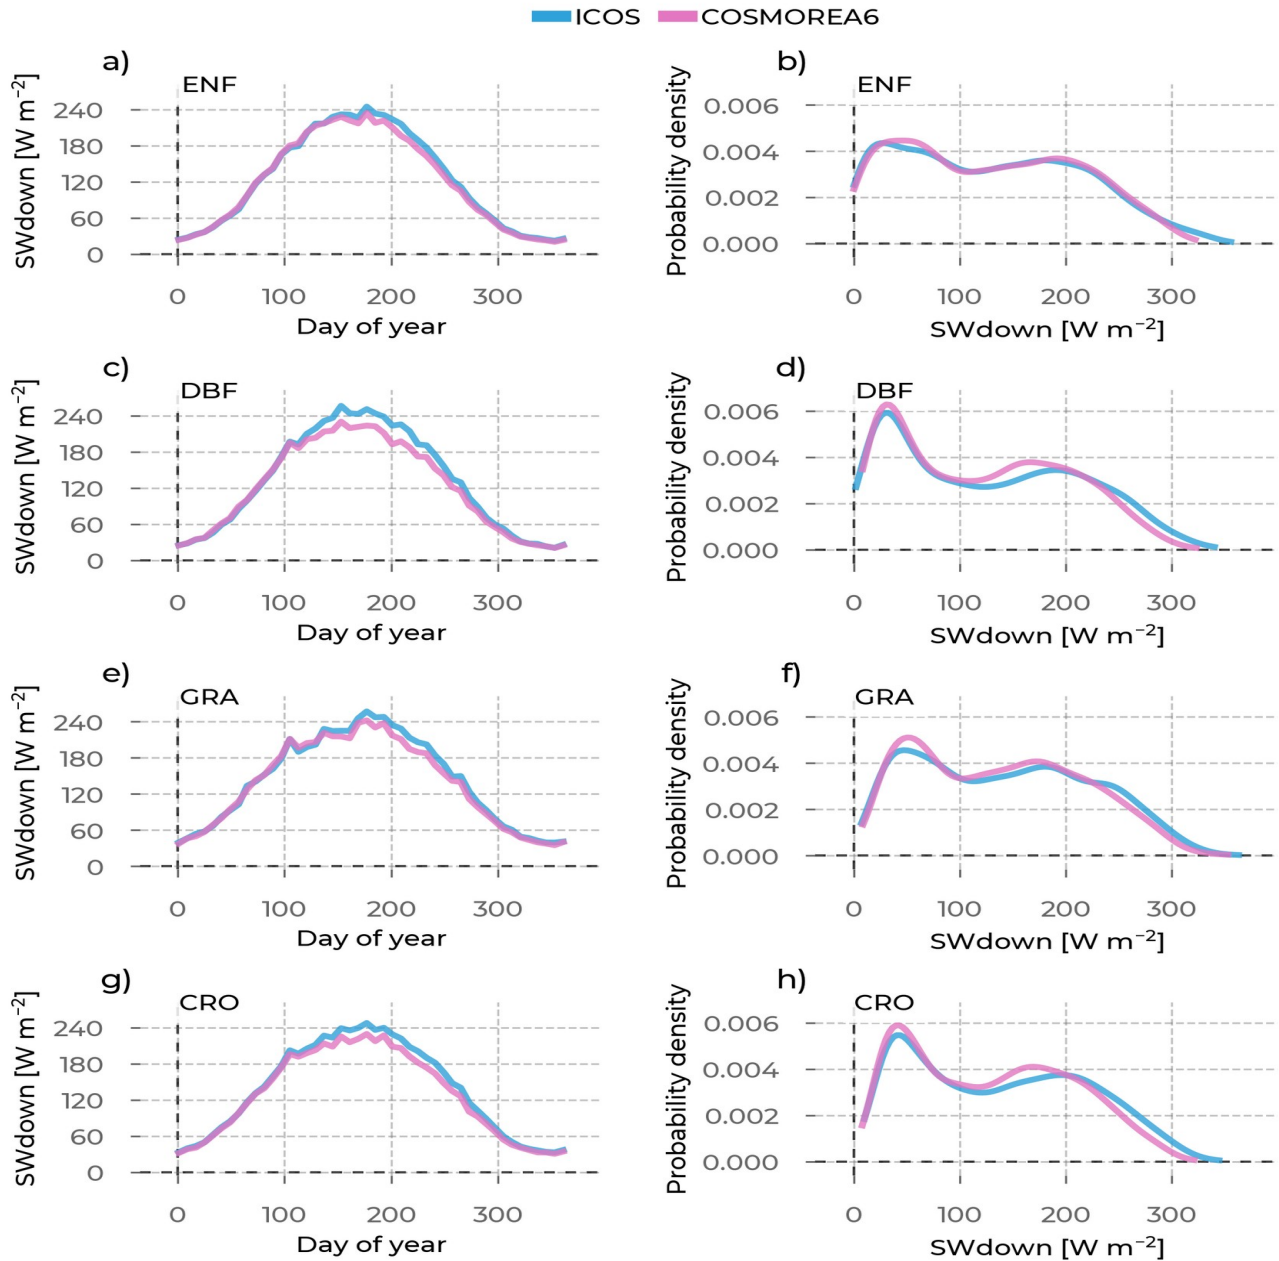

1290 **Figure S11:** In the left column are the yearly shortwave downward radiation (SWdown) evolutions averaged across stations belonging to one PFT (rows). We differentiate the data source by color (ICOS observations: blue, CLM5<sub>grid</sub>: red, CLM5<sub>PFT</sub>: yellow, GLASS: green, ERA5L: brown, GLEAM: purple). The probability density curves for all SWdown values from stations belonging to the selected PFT are in the right column. Each row shows these plots for

1295 **one PFT: Evergreen Needleleaf Forest (ENF), Deciduous Broadleaf Forest (DBF), Grasslands (GRA), and Croplands (CRO).**

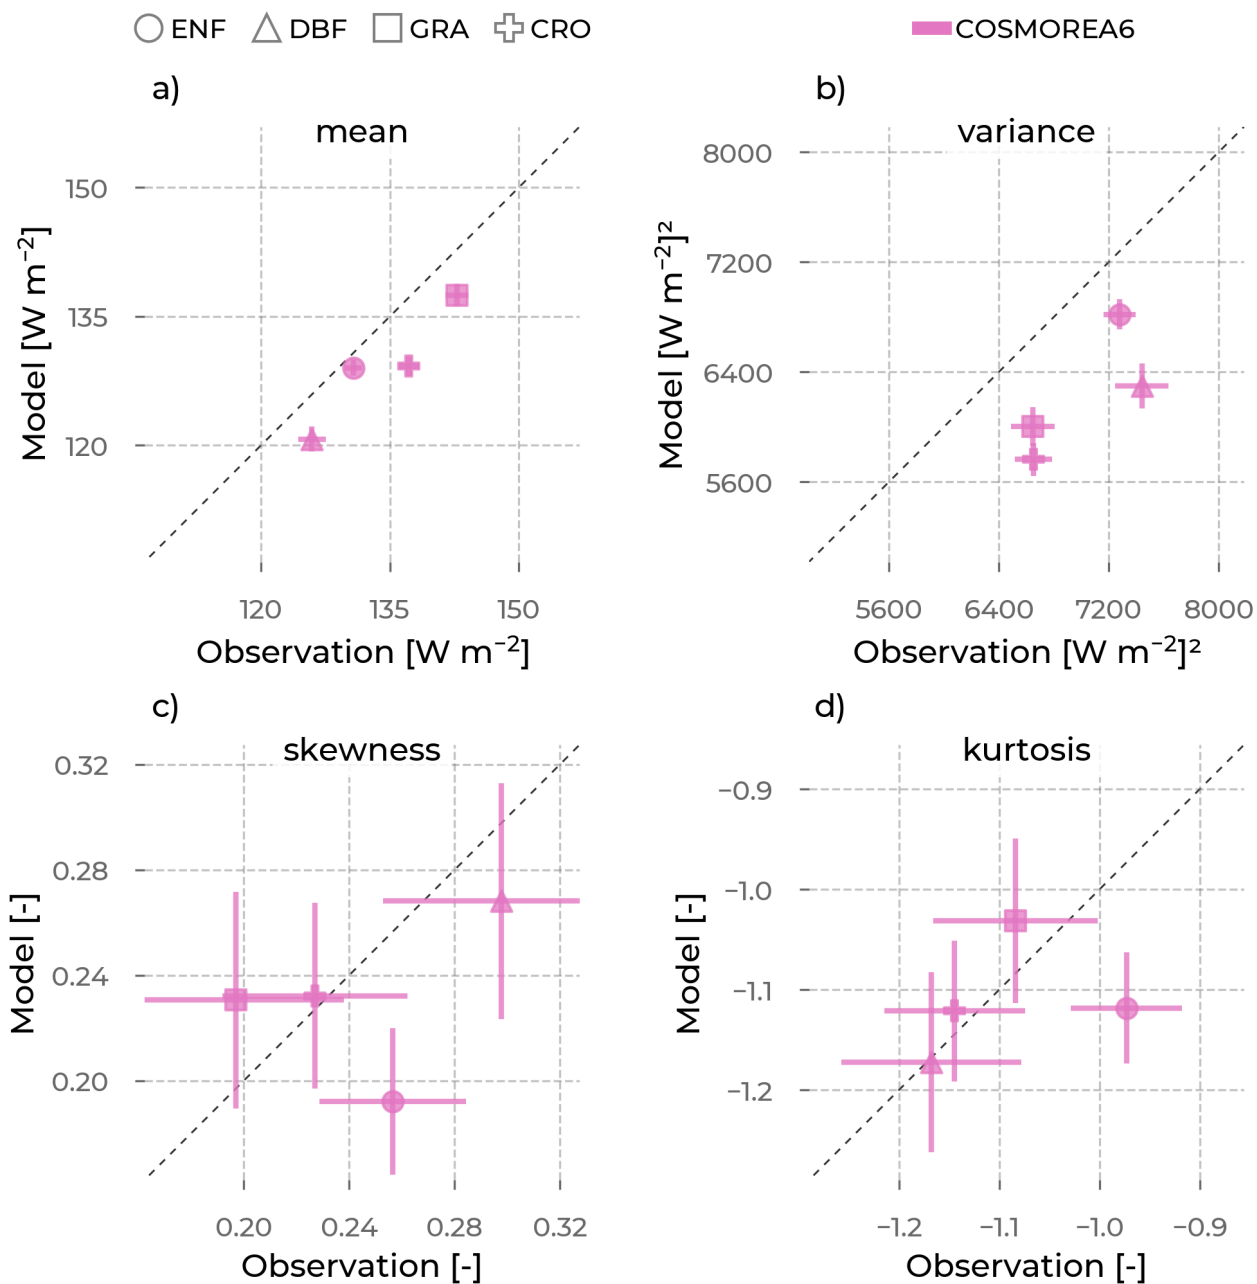

**Figure S12: The mean (a), variance (b), skewness (c), and kurtosis (d) of the SWdown distributions from the models (color, y-axis), as opposed to the corresponding values from**

1300 **observations (x-axis) aggregated for each PFT (marker type): Evergreen Needleleaf Forest (ENF), Deciduous Broadleaf Forest (DBF), Grasslands (GRA), Croplands (CRO). The error bars are the standard errors of the respective moment, depending on the sample size.**

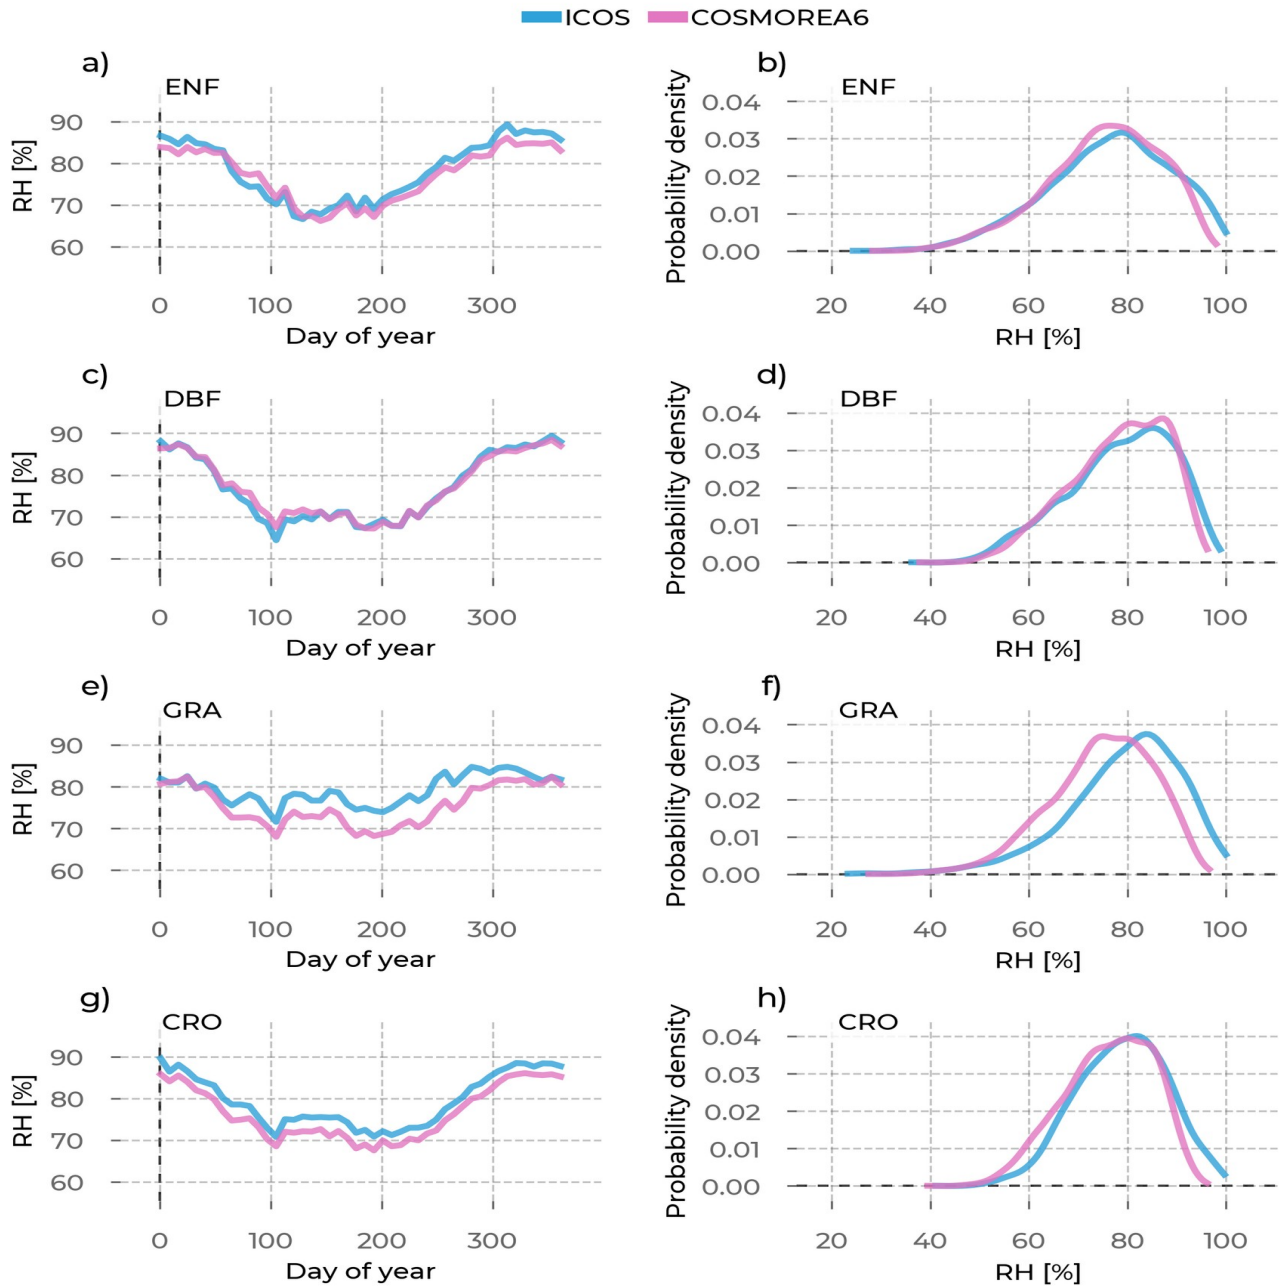

1305 **Figure S13:** In the left column are the yearly relative humidity (RH) evolutions averaged across stations belonging to one PFT (rows). We differentiate the data source by color (ICOS observations: blue, CLM5<sub>grid</sub>: red, CLM5<sub>PFT</sub>: yellow, GLASS: green, ERA5L: brown, GLEAM: purple). The probability density curves for all RH values from stations belonging to the selected

**PFT are in the right column. Each row shows these plots for one PFT: Evergreen Needleleaf Forest (ENF), Deciduous Broadleaf Forest (DBF), Grasslands (GRA), and Croplands (CRO).**

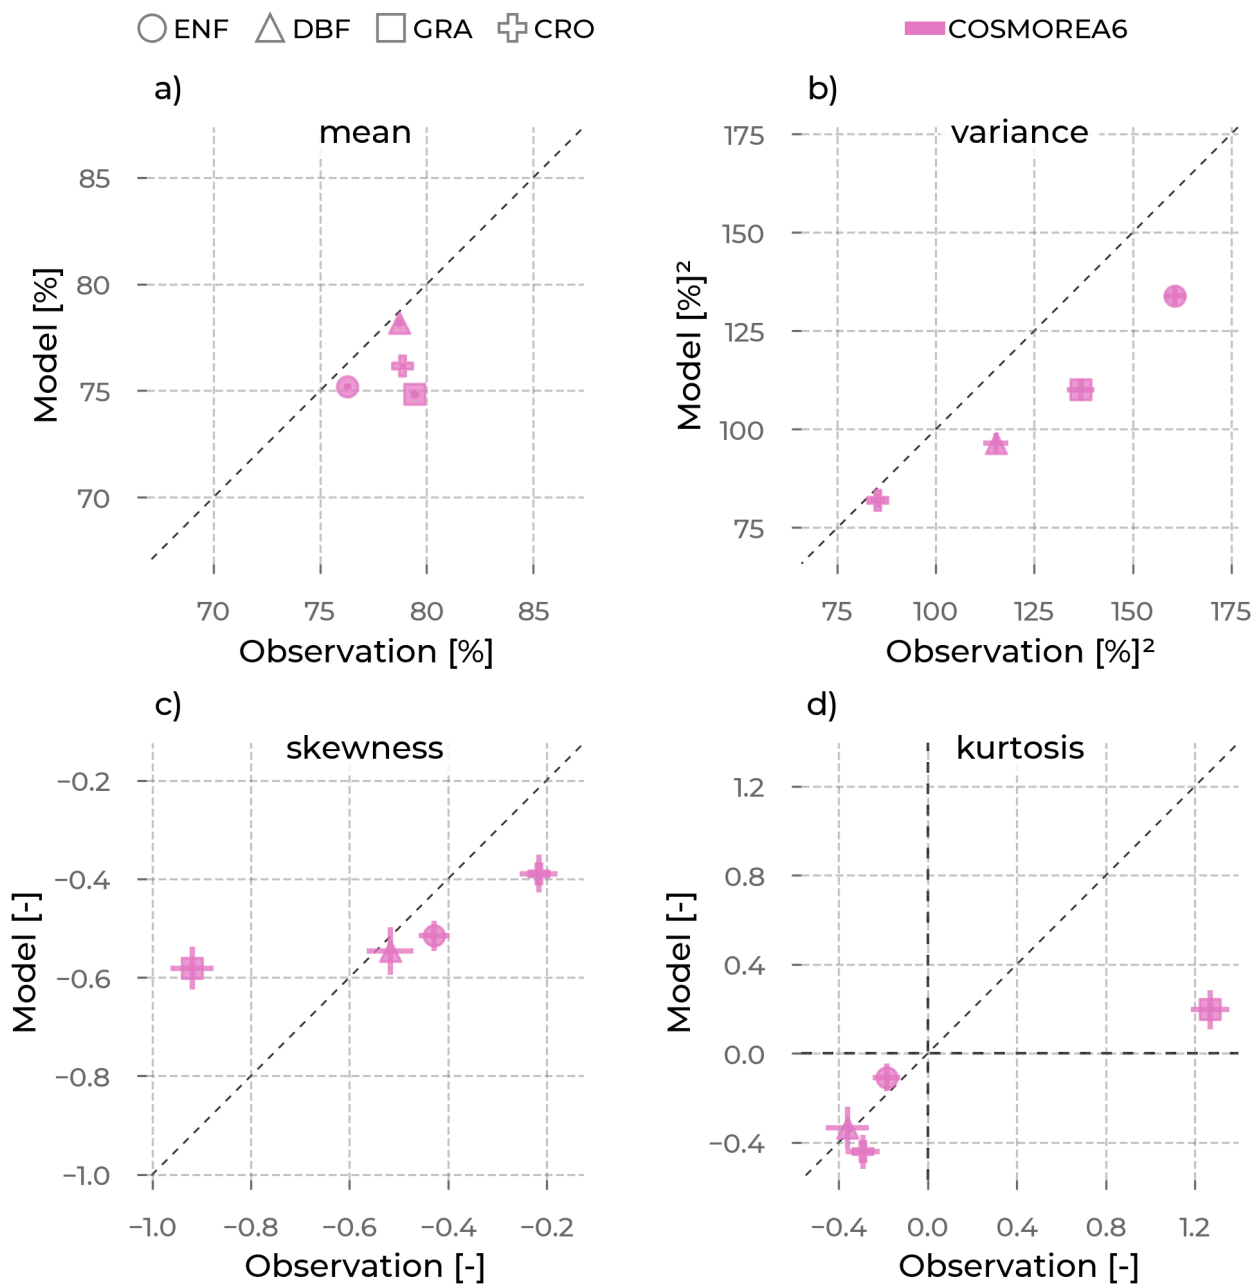

1310

**Figure S14: The mean (a), variance (b), skewness (c), and kurtosis (d) of the RH distributions from the models (color, y-axis), as opposed to the corresponding values from observations (x-**

1315 axis) aggregated for each PFT (marker type): Evergreen Needleleaf Forest (ENF), Deciduous Broadleaf Forest (DBF), Grasslands (GRA), Croplands (CRO). The error bars are the standard errors of the respective moment, depending on the sample size.
